# Supplementary material
Source: publisher site journal article supplement (https://content.cld.iop.org/journals/0957-4484/21/17/175602/revision1/nano175602suppdata.pdf)
Supplement: Supplementary file 1 [file nano175602suppdata.pdf]

## Supporting Information

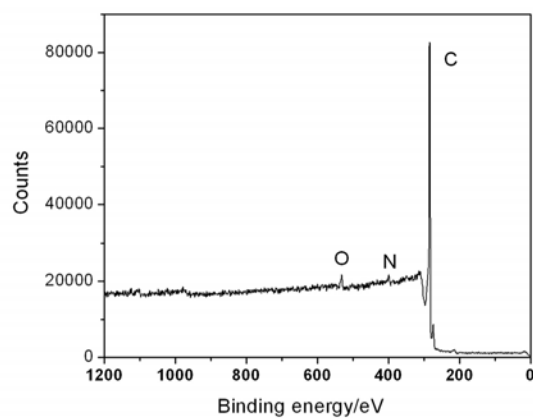

**Figure S1.** XPS spectra of graphene nanosheets produced in air. The content of C, N and O atoms are 96%, 2% and 2%, respectively.

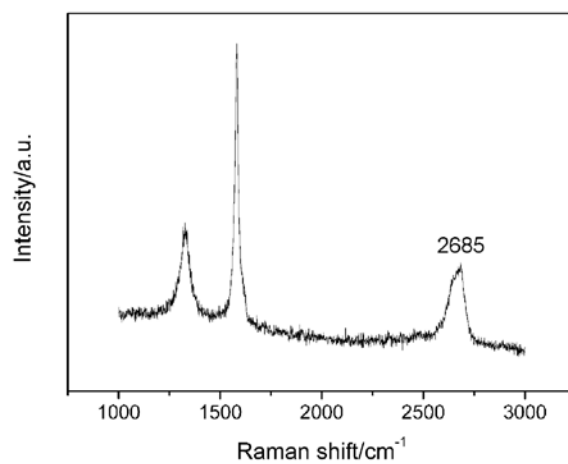

**Figure S2.** Raman spectra of graphite excited with a laser of 633 nm. The 2D band locates at 2685 cm<sup>-1</sup>.
